# Supplementary material
Source: PubMed Central journal article supplement (PMC4382398)
Supplement: NIHMS660788-supplement-Supplementary_Figure_17.pdf [file NIHMS660788-supplement-Supplementary_Figure_17.pdf]

## Supplementary figure 17

---

for

### **Image fusion of mass spectrometry and microscopy: a new multi-modality paradigm for molecular mapping of tissue**

Raf Van de Plas<sup>1</sup>, Junhai Yang<sup>1</sup>, Jeffrey Spraggins<sup>1</sup>, and Richard M. Caprioli<sup>1,2</sup>

<sup>1</sup> Mass Spectrometry Research Center and Department of Biochemistry, Vanderbilt University, Nashville, Tennessee, U.S.A.

<sup>2</sup> Departments of Chemistry, Pharmacology, and Medicine, Vanderbilt University, Nashville, Tennessee, U.S.A.

Correspondence should be addressed to R.M.C. ([richard.m.caprioli@vanderbilt.edu](mailto:richard.m.caprioli@vanderbilt.edu)).

Fusion for cross-modally supported IMS pattern with strong multi-modal relationships (reconstruction score of 87%):

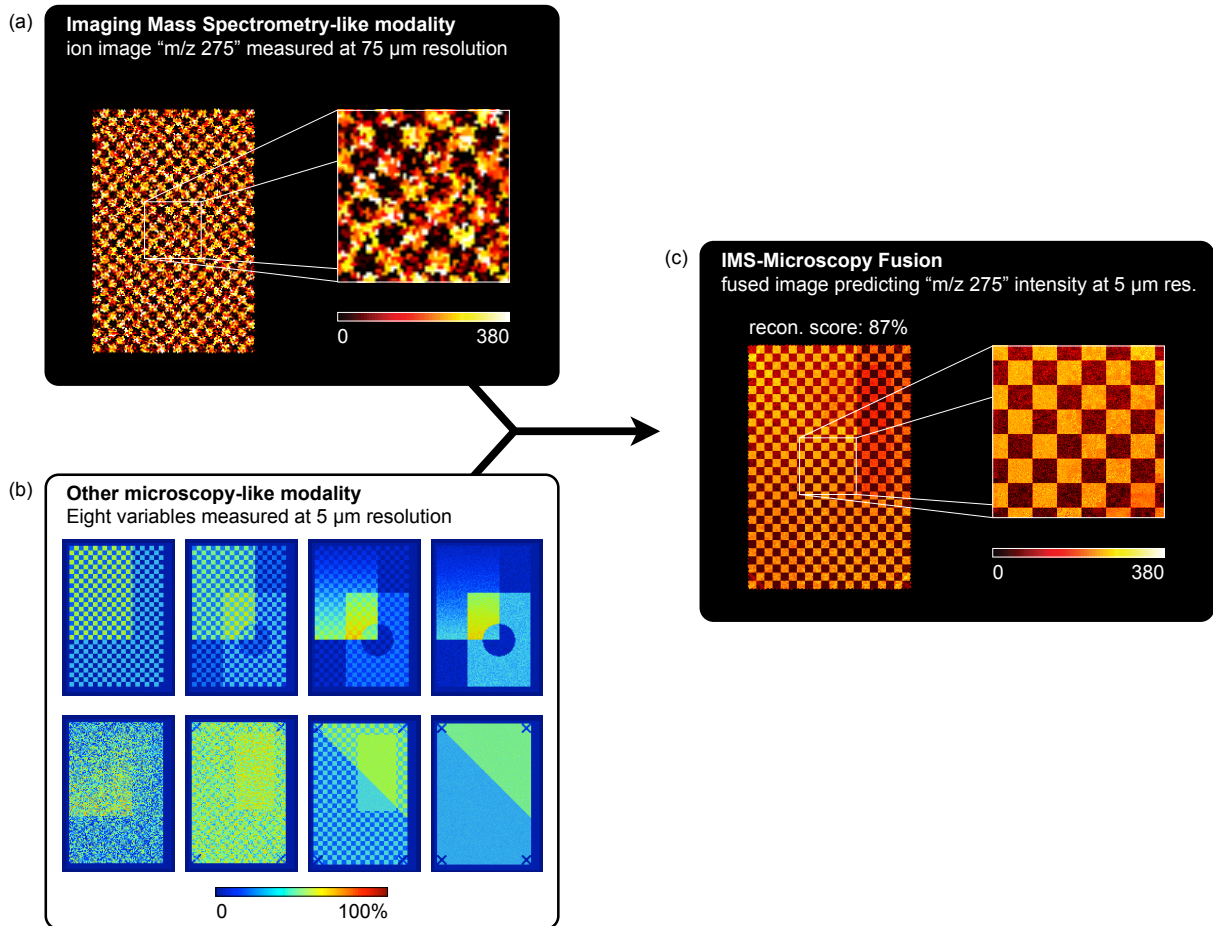

Fusion for cross-modally supported IMS pattern with weak global but strong local multi-modal relationships (recon. score of 81%):

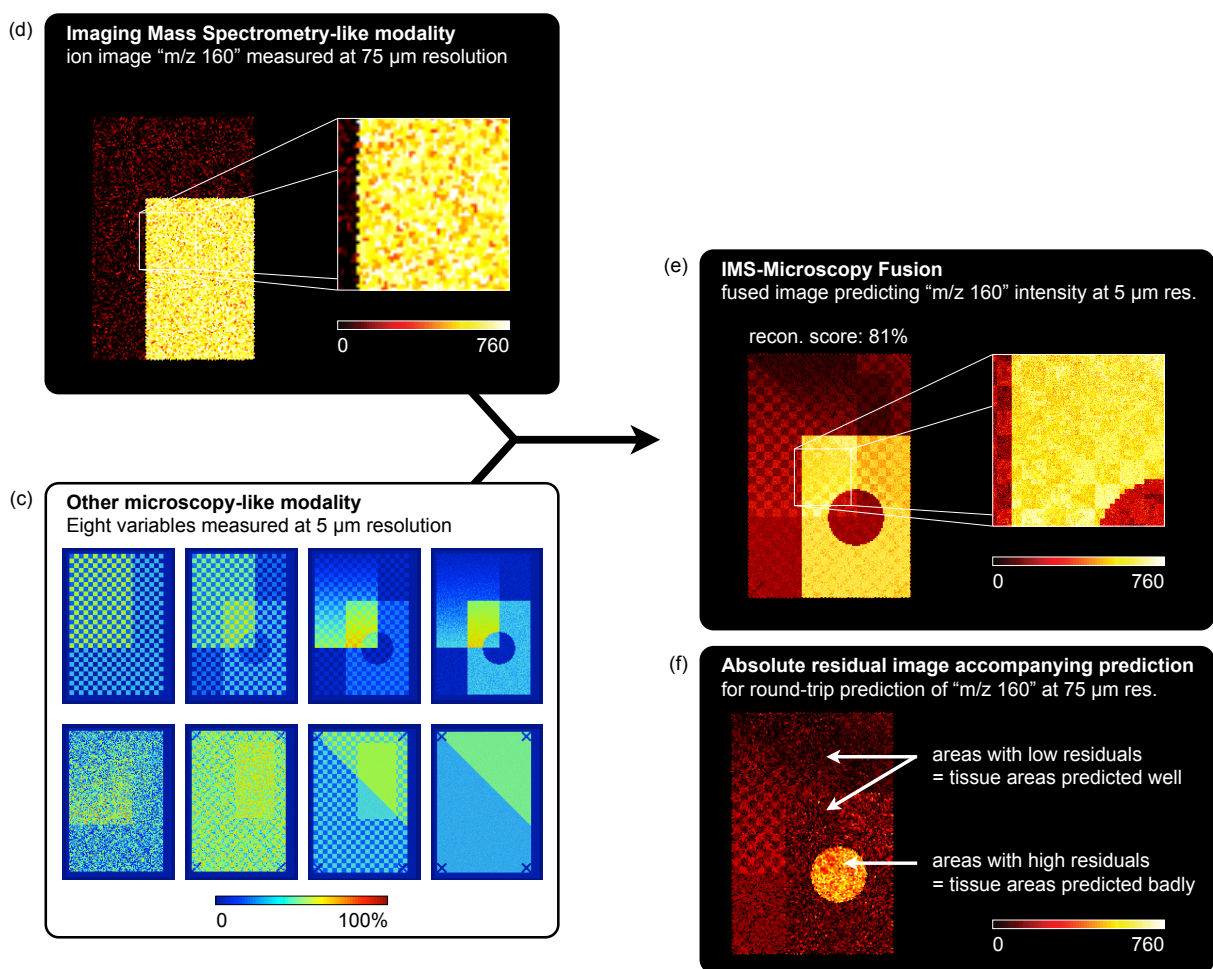

Fusion for modality-specific IMS pattern with no multi-modal relationships (reconstruction score of 66%):

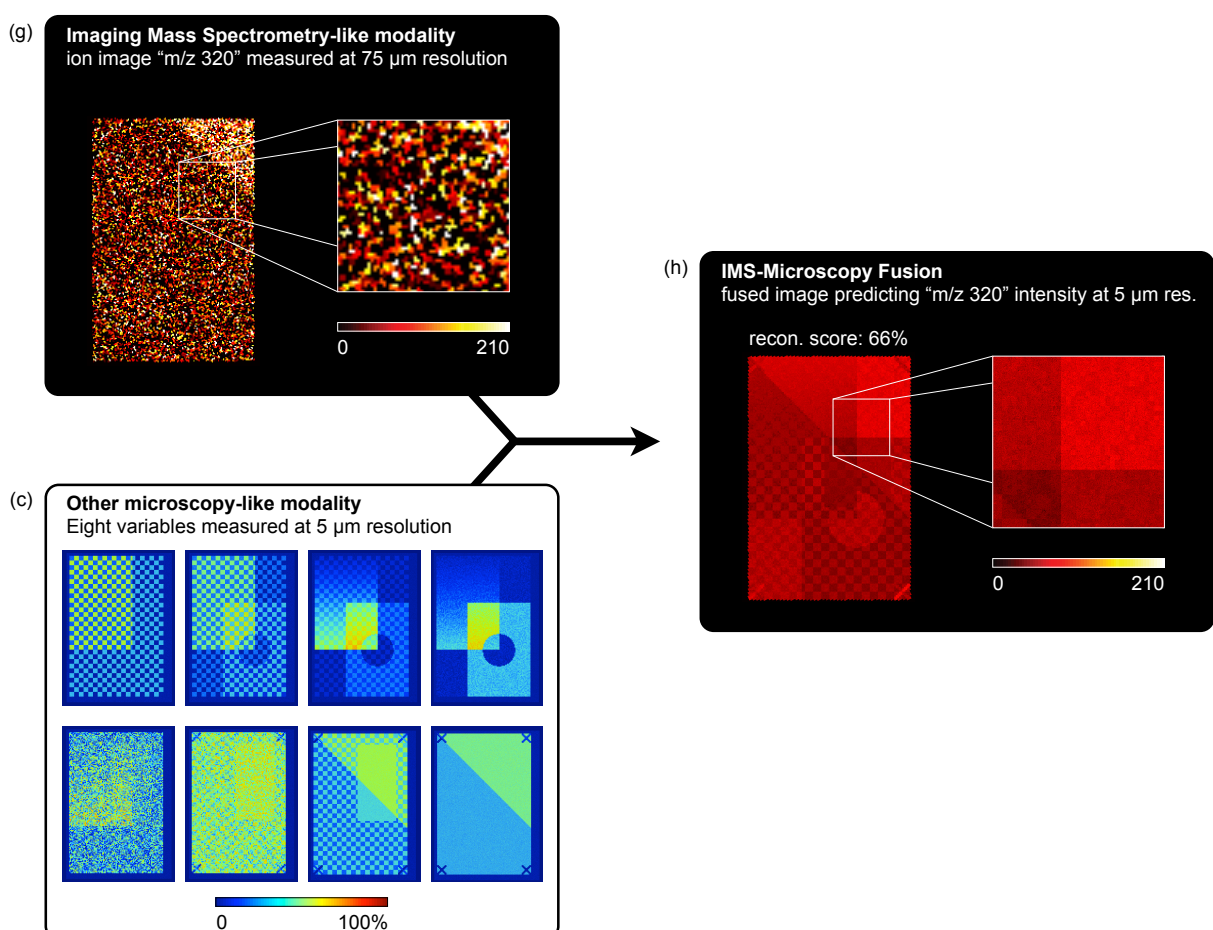

**Supplementary Figure 17** Prediction of ion distributions from a synthetic multi-modal data set with known cross-modal and modality-specific patterns (sharpening). The fusion task consists of integrating an IMS-like modality at 75  $\mu\text{m}$  spatial resolution with a microscopy-like modality acquired at 5  $\mu\text{m}$  (both with noise added), and to sharpen the IMS-like patterns to 5  $\mu\text{m}$ . The fusion method successfully finds all embedded cross-modal patterns and provides prediction for **(top)** a pattern with strong cross-modal support across the entire tissue (reconstr. score 87%), **(middle)** a pattern with partial cross-modal support (reconstr. score 81%, the location of good prediction is pinpointed via the absolute residual image), and **(bottom)** a modality-specific pattern with little to no cross-modal support (reconstr. score 66%).
