# Supplementary material
Source: PubMed Central journal article supplement (PMC4382398)
Supplement: NIHMS660788-supplement-Supplementary_Figures_1-4.pdf [file NIHMS660788-supplement-Supplementary_Figures_1-4.pdf]

## Supplementary figures 1 through 4

---

for

### **Image fusion of mass spectrometry and microscopy: a new multi-modality paradigm for molecular mapping of tissue**

Raf Van de Plas<sup>1</sup>, Junhai Yang<sup>1</sup>, Jeffrey Spraggins<sup>1</sup>, and Richard M. Caprioli<sup>1,2</sup>

<sup>1</sup> Mass Spectrometry Research Center and Department of Biochemistry, Vanderbilt University, Nashville, Tennessee, U.S.A.

<sup>2</sup> Departments of Chemistry, Pharmacology, and Medicine, Vanderbilt University, Nashville, Tennessee, U.S.A.

Correspondence should be addressed to R.M.C. ([richard.m.caprioli@vanderbilt.edu](mailto:richard.m.caprioli@vanderbilt.edu)).

(a) Method Phase I - Model building and evaluation

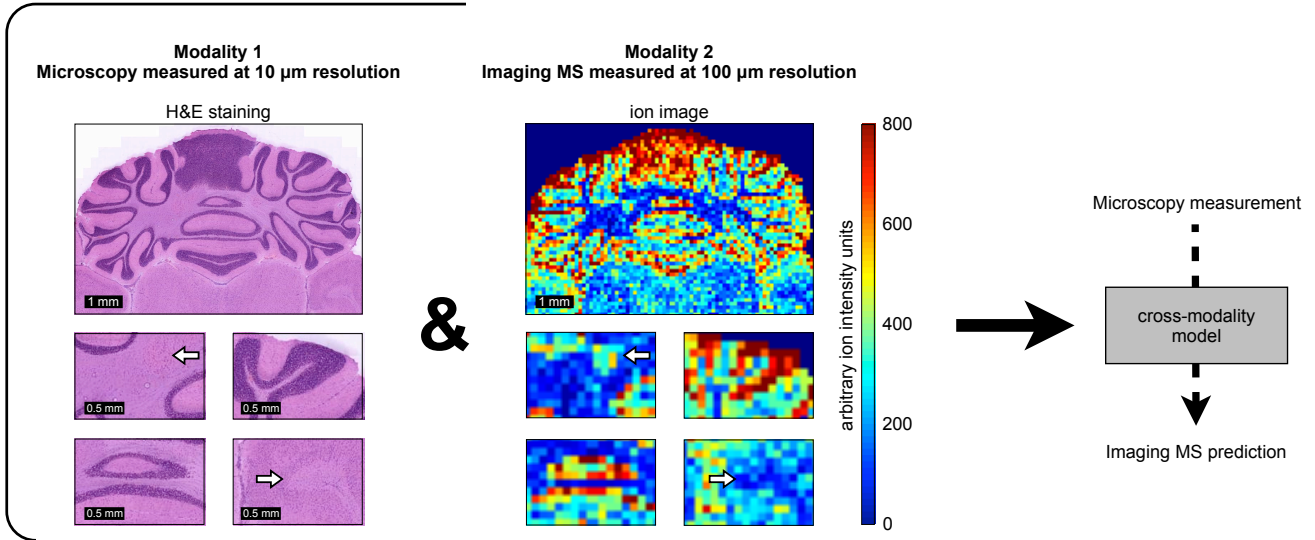

(b) Method Phase II - Prediction from microscopy using model

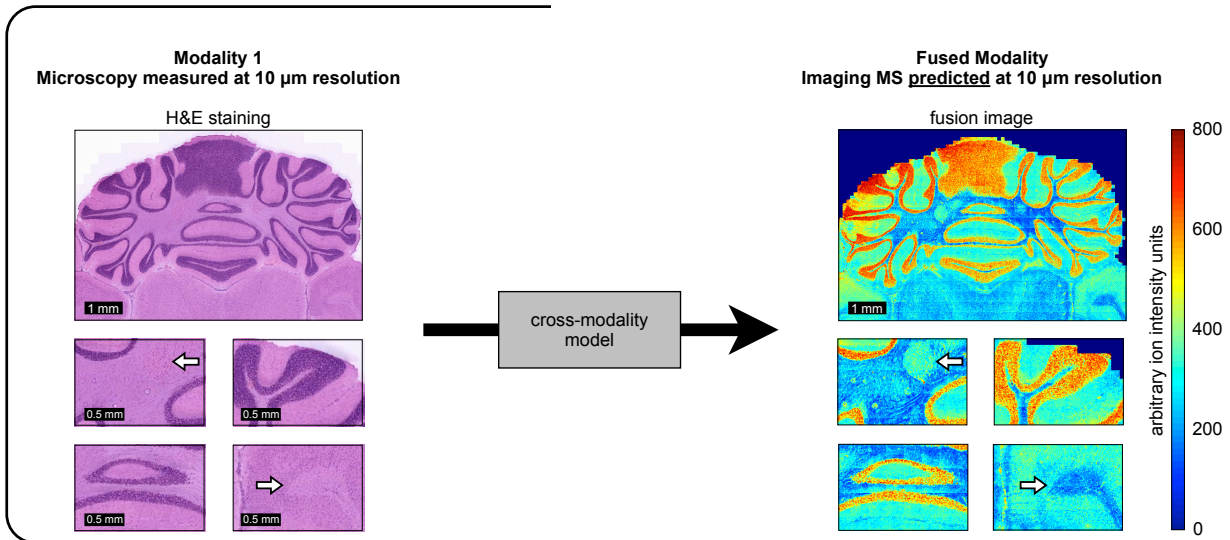

**Supplementary Figure 1** Method overview. The fusion process consists of two phases. (a) Phase I builds a cross-modality model from the two measurement sources and evaluates for which ions good prediction is possible. (b) For those ions, phase II uses the model and the high-resolution microscopy measurements to predict the ion distribution at higher-than-IMS resolutions.

Phase I: Model Building and Evaluation

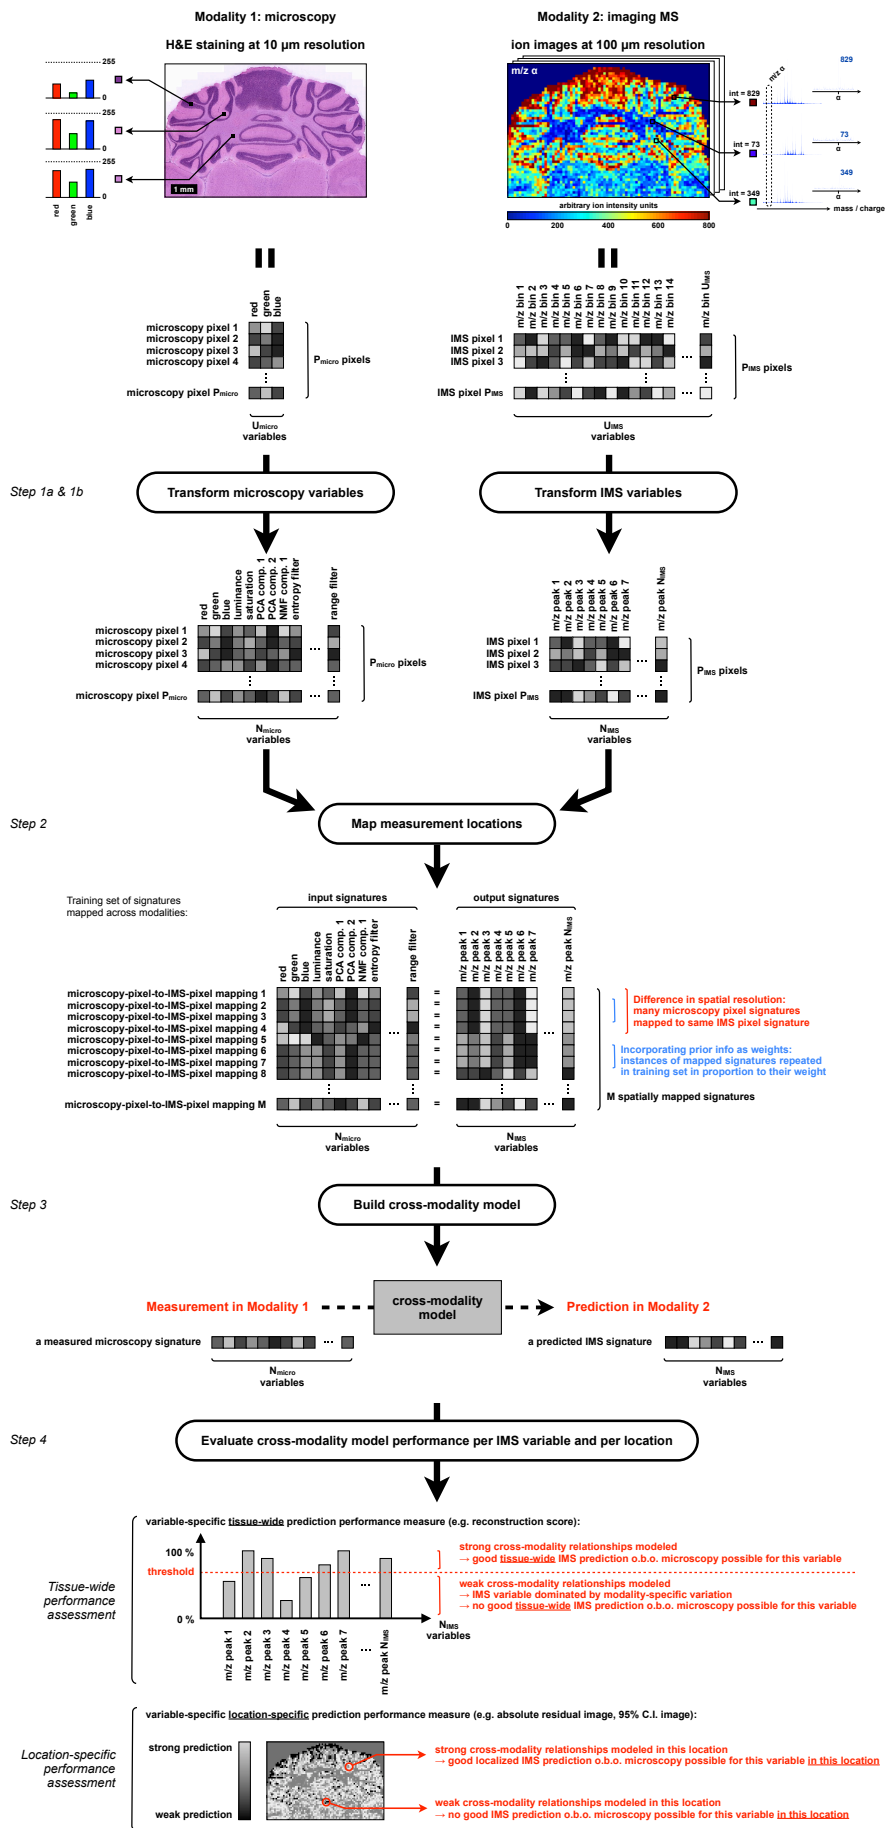

Phase II: Prediction

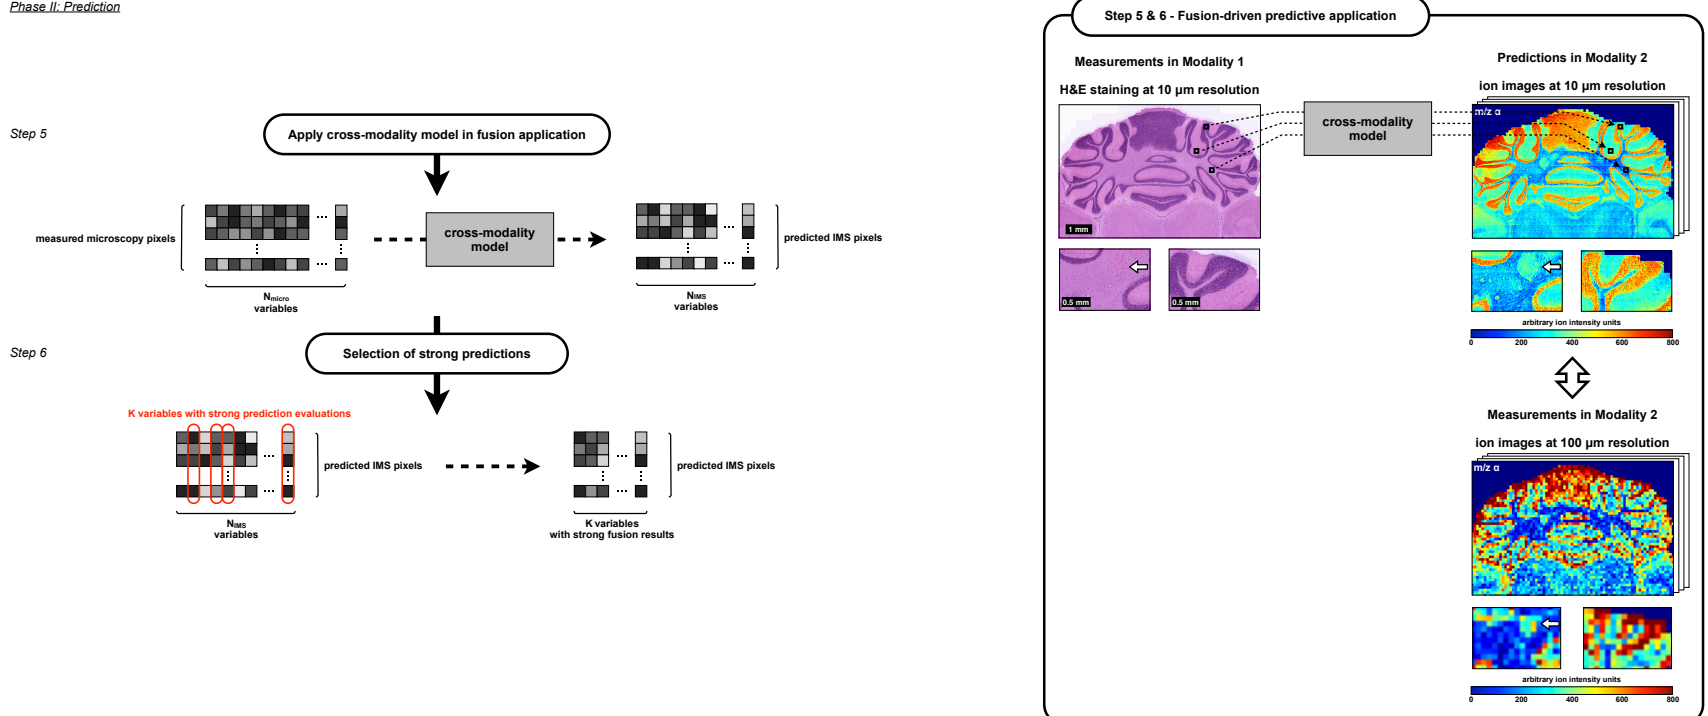

**Supplementary Figure 2** Extensive step-by-step details of the fusion process. In the two-phase fusion method, phase I focuses on building and evaluating a cross-modality model between the provided modalities. It entails a transformation of the microscopy variables (step 1a) and the IMS variables (step 1b), a spatial mapping of both measurement sets (step 2), building the model (step 3), and evaluating model performance both chemically and spatially (step 4). Phase II employs the cross-modality model in a predictive application, and entails a prediction for all IMS variables (step 5) followed by a pruning of IMS variables for which predictive performance is insufficient (step 6).

Phase I: Model Building and Evaluation

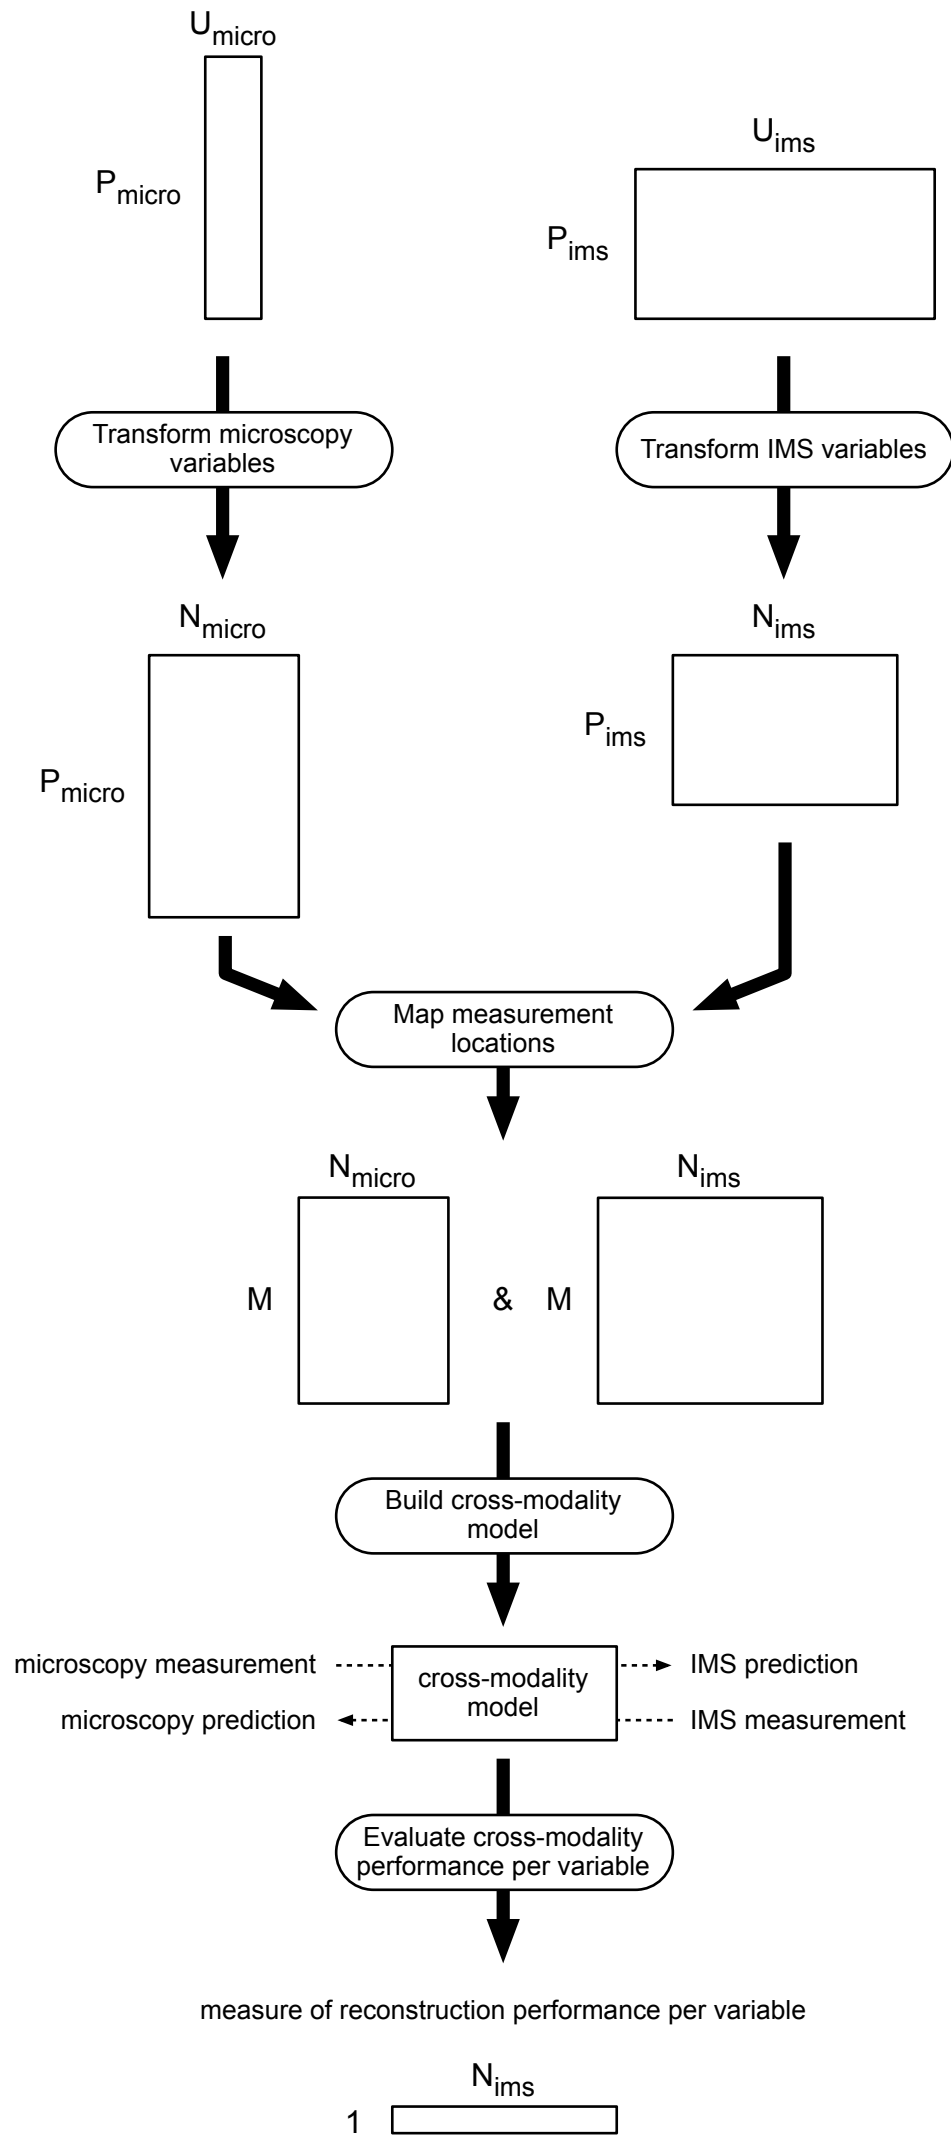

Phase II: Prediction

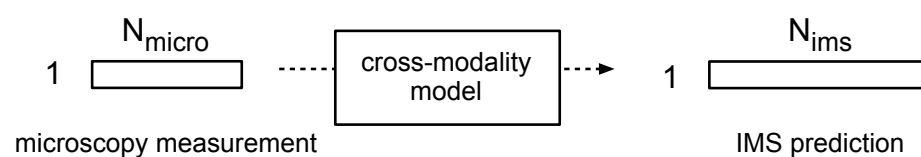

**Supplementary Figure 3** Method phases and steps with algebraic details. Algebraic details on the structure and size of the input and output data of each method step throughout the fusion procedure.  $P_{\text{ims}}$  = number of pixels in the IMS data source;  $U_{\text{ims}}$  = number of native variables per pixel provided by the IMS data source;  $N_{\text{ims}}$  = number of variables per pixel provided by the IMS data source after transformation;  $P_{\text{micro}}$  = number of pixels in the microscopy data source;  $U_{\text{micro}}$  = number of native variables per pixel provided by the microscopy data source;  $N_{\text{micro}}$  = number of variables per pixel provided by the microscopy data source after transformation; and  $M$  = number of mapped IMS and microscopy signatures.

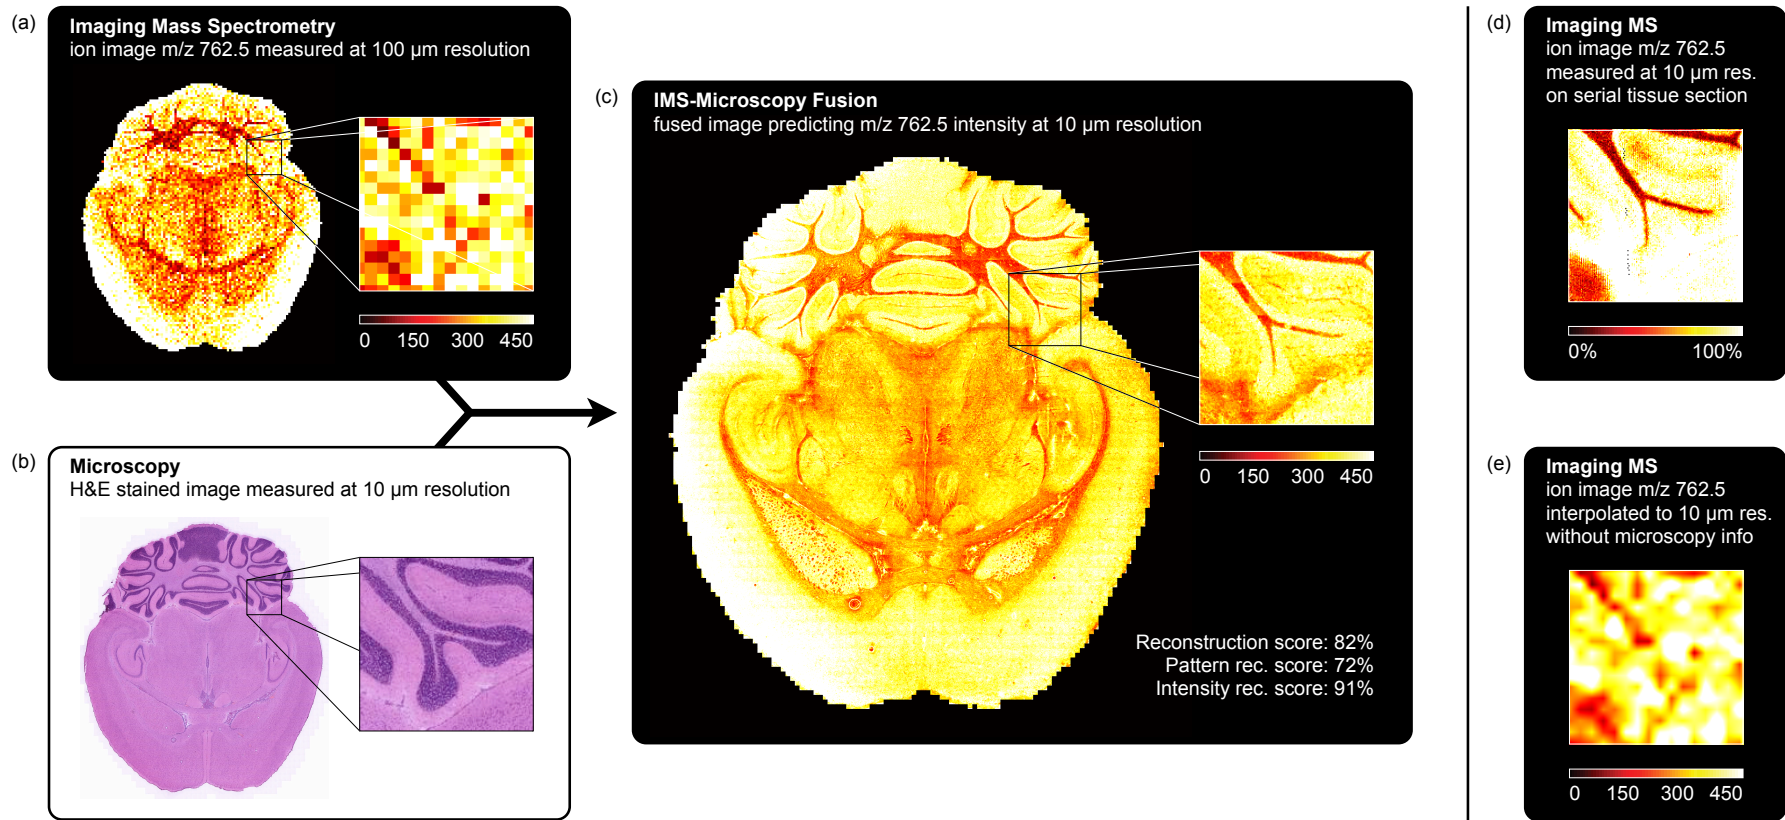

**Supplementary Figure 4** Prediction of the ion distribution of m/z 762.5 in mouse brain at 10  $\mu\text{m}$  resolution from 100  $\mu\text{m}$  IMS and 10  $\mu\text{m}$  microscopy measurements (sharpening). This example in mouse brain fuses a measured ion image for m/z 762.5 (identified as lipid PE(16:0/22:6)) at 100  $\mu\text{m}$  spatial resolution (a) with a measured H&E-stained microscopy image at 10  $\mu\text{m}$  resolution (b), predicting the ion distribution of m/z 762.5 at 10  $\mu\text{m}$  resolution (reconstr. score 82%) (c). For comparison, (d) shows a measured ion image for m/z 762.5 at 10  $\mu\text{m}$  spatial resolution, acquired from a neighboring tissue section. Additionally, (e) shows a 10  $\mu\text{m}$  version of the m/z 762.5 ion image obtained through interpolation, a computational up-sampling method that does not employ information from another modality to guide its estimates.
