# Supplementary material
Source: PubMed Central journal article supplement (PMC4382398)
Supplement: NIHMS660788-supplement-Supplementary_Figures_13-16.pdf [file NIHMS660788-supplement-Supplementary_Figures_13-16.pdf]

## Supplementary figures 13 through 16

---

for

### **Image fusion of mass spectrometry and microscopy: a new multi-modality paradigm for molecular mapping of tissue**

Raf Van de Plas<sup>1</sup>, Junhai Yang<sup>1</sup>, Jeffrey Spraggins<sup>1</sup>, and Richard M. Caprioli<sup>1,2</sup>

<sup>1</sup> Mass Spectrometry Research Center and Department of Biochemistry, Vanderbilt University, Nashville, Tennessee, U.S.A.

<sup>2</sup> Departments of Chemistry, Pharmacology, and Medicine, Vanderbilt University, Nashville, Tennessee, U.S.A.

Correspondence should be addressed to R.M.C. ([richard.m.caprioli@vanderbilt.edu](mailto:richard.m.caprioli@vanderbilt.edu)).

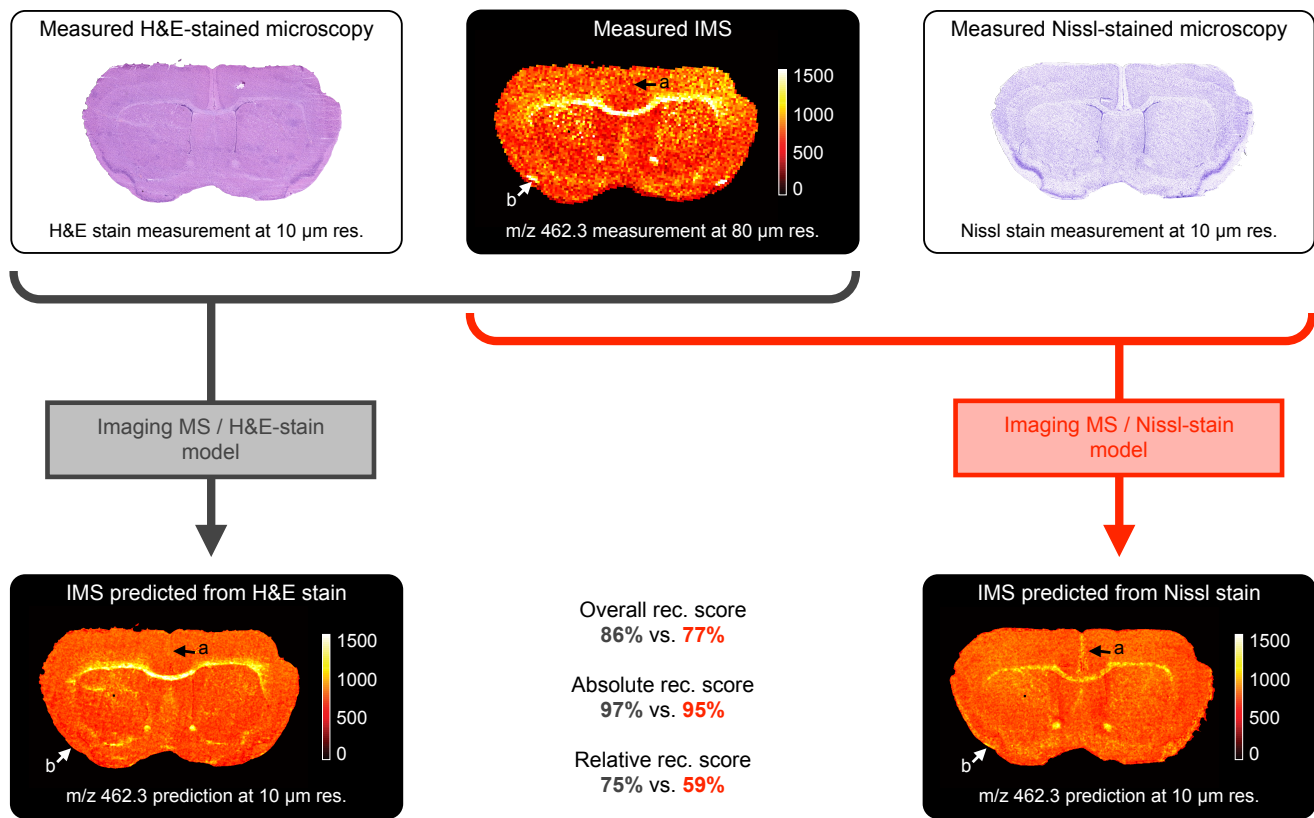

**Supplementary Figure 13** Prediction of the ion distribution of m/z 462.3 in mouse brain at 10  $\mu\text{m}$  resolution from 80  $\mu\text{m}$  IMS and 10  $\mu\text{m}$  H&E versus Nissl stained microscopy measurements (sharpening). (**left**) A measured ion image for m/z 462.3 at 80  $\mu\text{m}$  spatial resolution is fused with a measured H&E stained microscopy image at 10  $\mu\text{m}$  resolution, predicting the ion distribution of m/z 462.3 at 10  $\mu\text{m}$  resolution (reconstr. score 86%). (**right**) An identical fusion procedure using a measured Nissl stained microscopy image at 10  $\mu\text{m}$  resolution, instead of the H&E stain, delivers an ion distribution prediction for m/z 462.3 at 10  $\mu\text{m}$  resolution with a reconstruction score of 77% at the native IMS resolution (80  $\mu\text{m}$ ).

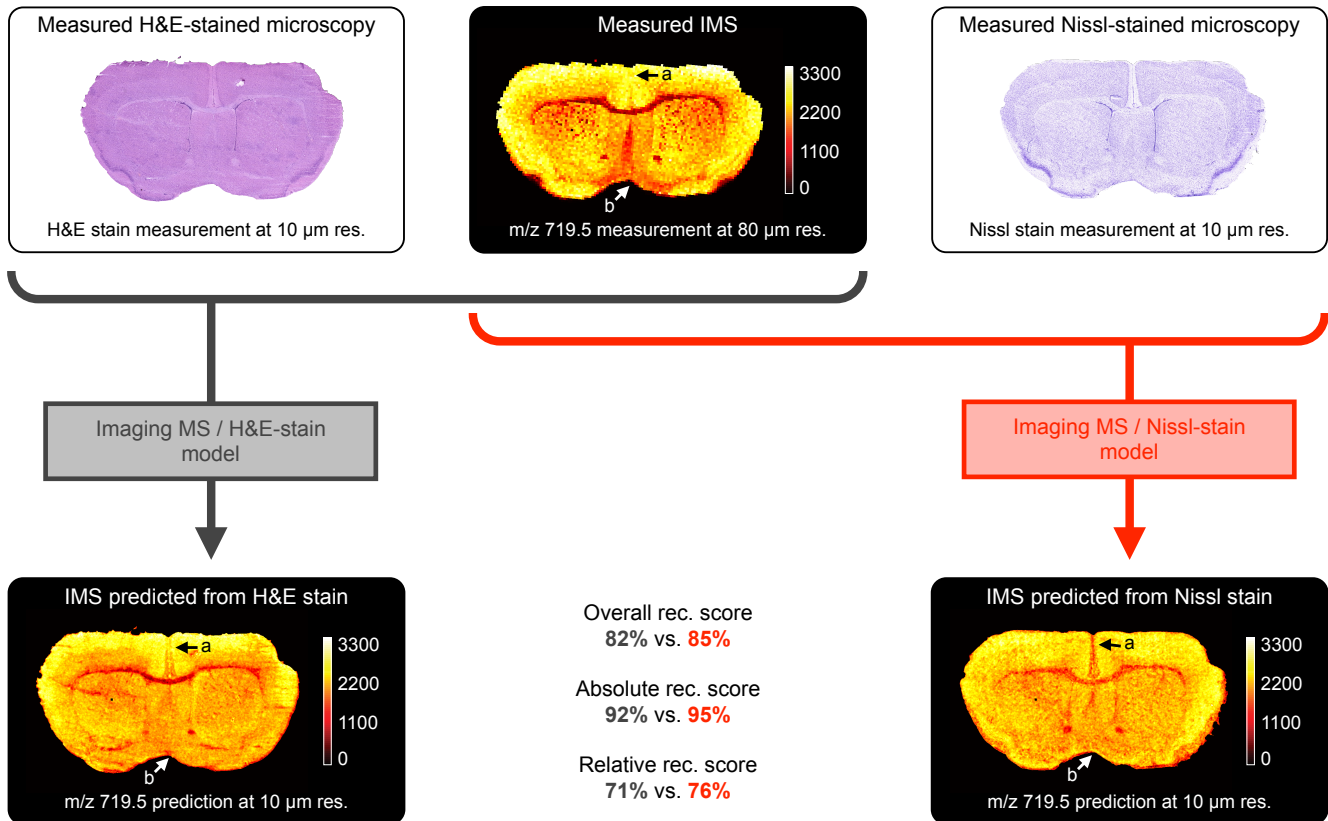

**Supplementary Figure 14** Prediction of the ion distribution of m/z 719.5 in mouse brain at 10  $\mu\text{m}$  resolution from 80  $\mu\text{m}$  IMS and 10  $\mu\text{m}$  H&E versus Nissl stained microscopy measurements (sharpening). **(left)** A measured ion image for m/z 719.5 at 80  $\mu\text{m}$  spatial resolution is fused with a measured H&E stained microscopy image at 10  $\mu\text{m}$  resolution, predicting the ion distribution of m/z 719.5 at 10  $\mu\text{m}$  resolution (reconstr. score 82%). **(right)** An identical fusion procedure using a measured Nissl stained microscopy image at 10  $\mu\text{m}$  resolution, instead of the H&E stain, delivers an ion distribution prediction for m/z 719.5 at 10  $\mu\text{m}$  resolution with a reconstruction score of 85% at the native IMS resolution (80  $\mu\text{m}$ ). Ion m/z 719.5 is identified as PA(38:6).

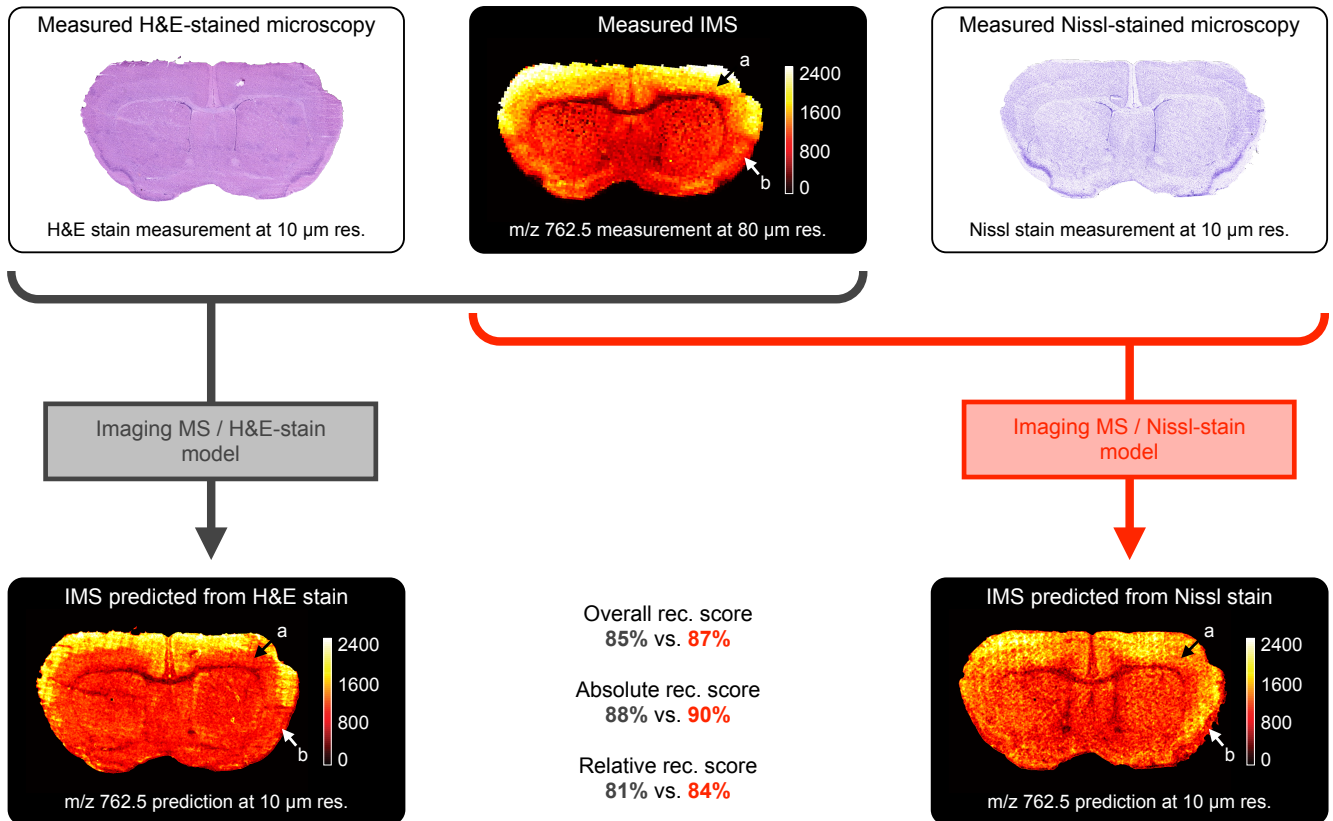

**Supplementary Figure 15** Prediction of the ion distribution of m/z 762.5 in mouse brain at 10  $\mu\text{m}$  resolution from 80  $\mu\text{m}$  IMS and 10  $\mu\text{m}$  H&E versus Nissl stained microscopy measurements (sharpening). (**left**) A measured ion image for m/z 762.5 at 80  $\mu\text{m}$  spatial resolution is fused with a measured H&E stained microscopy image at 10  $\mu\text{m}$  resolution, predicting the ion distribution of m/z 762.5 at 10  $\mu\text{m}$  resolution (reconstr. score 85%). (**right**) An identical fusion procedure using a measured Nissl stained microscopy image at 10  $\mu\text{m}$  resolution, instead of the H&E stain, delivers an ion distribution prediction for m/z 762.5 at 10  $\mu\text{m}$  resolution with a reconstruction score of 87% at the native IMS resolution (80  $\mu\text{m}$ ). Ion m/z 762.5 is identified as PE(16:0/22:6).

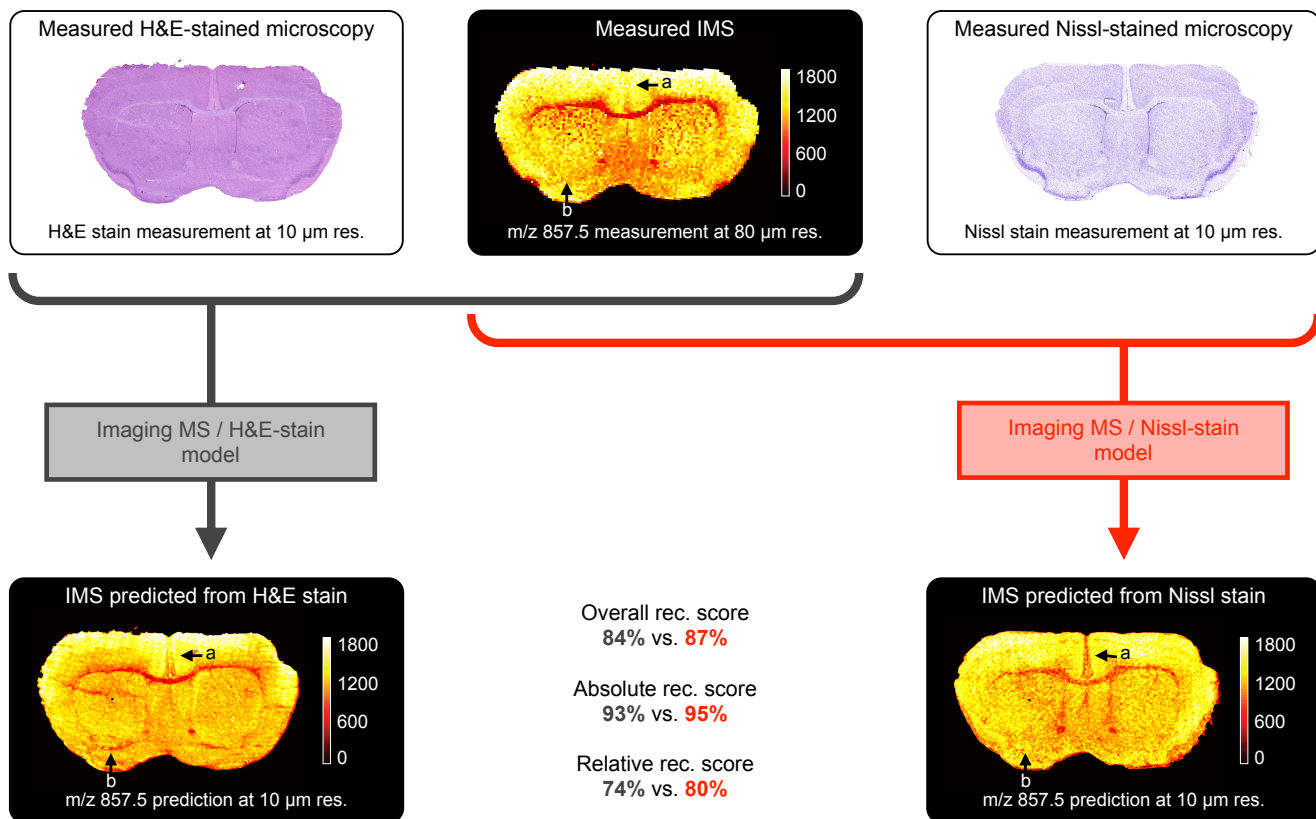

**Supplementary Figure 16** Prediction of the ion distribution of m/z 857.5 in mouse brain at 10  $\mu\text{m}$  resolution from 80  $\mu\text{m}$  IMS and 10  $\mu\text{m}$  H&E versus Nissl stained microscopy measurements (sharpening). (**left**) A measured ion image for m/z 857.5 at 80  $\mu\text{m}$  spatial resolution is fused with a measured H&E stained microscopy image at 10  $\mu\text{m}$  resolution, predicting the ion distribution of m/z 857.5 at 10  $\mu\text{m}$  resolution (reconstr. score 84%). (**right**) An identical fusion procedure using a measured Nissl stained microscopy image at 10  $\mu\text{m}$  resolution, instead of the H&E stain, delivers an ion distribution prediction for m/z 857.5 at 10  $\mu\text{m}$  resolution with a reconstruction score of 87% at the native IMS resolution (80  $\mu\text{m}$ ). Ion m/z 857.5 is identified as PI(16:0/20:4).
